# Supplementary material for: ADAR1 regulates vascular remodeling in hypoxic pulmonary hypertension through N1-methyladenosine modification of circCDK17
Source: PubMed Central journal article supplement — Acta Pharm Sin B. 2023 Jul 11;13(12):4840–55. doi: 10.1016/j.apsb.2023.07.006 (PMC10692360; doi:10.1016/j.apsb.2023.07.006), 2023-07-11
Supplement: mmc1.pdf [file mmc1.pdf]

## Supporting Information for

### Original article

# ADAR1 regulates vascular remodeling in hypoxic pulmonary hypertension through N1-methyladenosine modification of circCDK17

Junting Zhang<sup>a,†</sup>; Yiyi Li<sup>a,†</sup>; Jianchao Zhang<sup>a</sup>; Lu Liu<sup>b</sup>; Yuan Chen<sup>c</sup>; Xusheng Yang<sup>c</sup>,  
Xueyi Liao<sup>a</sup>; Muhua He<sup>b</sup>; Zihui Jia<sup>c</sup>; Jun Fan<sup>d</sup>; Jin-Song Bian<sup>b,\*</sup>; Xiaowei Nie<sup>a,\*</sup>

<sup>a</sup>*Shenzhen Institute of Respiratory Disease, Shenzhen Key Laboratory of Respiratory Disease, Shenzhen People's Hospital (the Second Clinical Medical College, Jinan University; the First Affiliated Hospital, Southern University of Science and Technology), Shenzhen 518020, China; Post-Doctoral Scientific Research Station of Basic Medicine, Jinan University, Guangzhou 510632, China*

<sup>b</sup>*Department of Pharmacology, School of Medicine, Southern University of Science and Technology, Shenzhen 518055, China*

<sup>c</sup>*Lung Transplant Group, Wuxi People's Hospital Affiliated to Nanjing Medical University, Wuxi 211103, China*

<sup>d</sup>*Department of Medical Biochemistry and Molecular Biology, School of Medicine, Jinan University, Guangzhou 510632, China*

Received 7 April 2023; received in revised form 13 June 2023; accepted 5 July 2023

\*Corresponding authors.

E-mail addresses: [bianjs@sustech.edu.cn](mailto:bianjs@sustech.edu.cn) (Jin-Song Bian),  
[niexw2021@mail.sustech.edu.cn](mailto:niexw2021@mail.sustech.edu.cn) (Xiaowei Nie).

<sup>†</sup>These authors made equal contributions to this work.

## Supplementary Figures

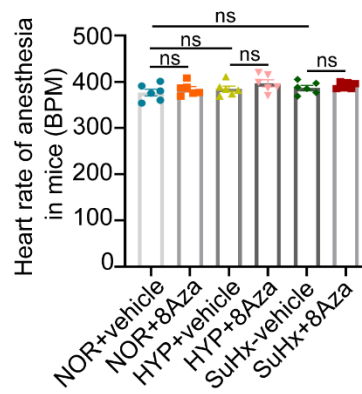

**Figure S1.** Effect of 8Aza on heart rate in different PH mouse models. n=6. NOR, normoxia; HYP, hypoxia; NC, negative control; 8Aza, 8-Azaadenosine; ns, no significance; Statistical analysis was performed with two-way ANOVA followed by Dunnett's test; All values are presented as mean  $\pm$  SEM.

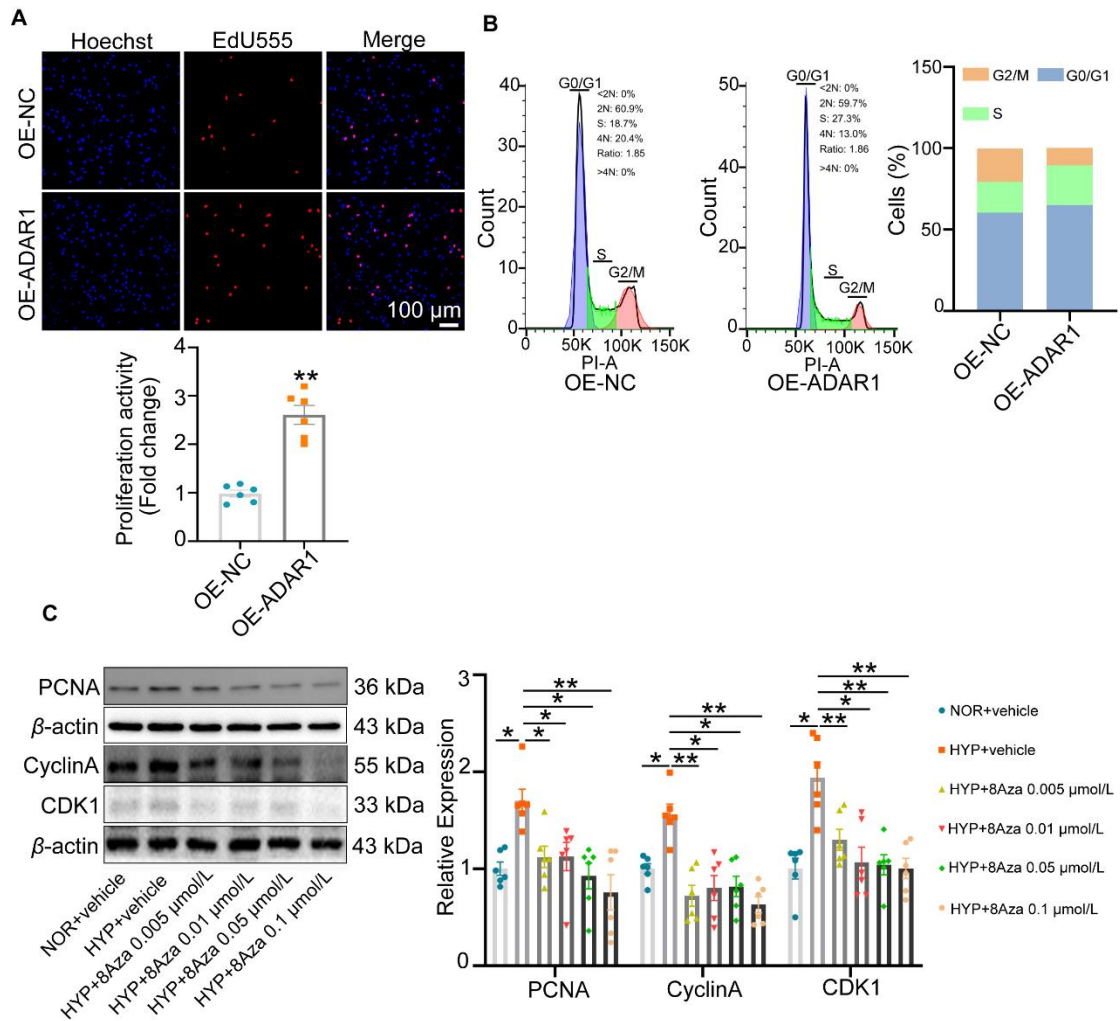

**Figure S2. Effect of ADAR1 on cell proliferation in PSMCs. (A)** EdU assay showing that overexpression of ADAR1 (OE-ADAR1) increased cell proliferation in PSMCs. n=6. **(B)** Flow cytometry showing that the effect of OE-ADAR1 on cell cycle progression. n=6. **(C)** Representative Western blots and group data showing the concentration-dependent effect of 8Aza on protein expression of PCNA, cyclin A and CDK1 in the hypoxia situation. n=6. NOR, normoxia; HYP, hypoxia; NC, negative control; OE, ADAR1 overexpression plasmid; Statistical analysis was performed with two-way ANOVA followed by Dunnett's test or the Student's t-test; All values are presented as mean  $\pm$  SEM. \*P<0.05, \*\*P<0.01, \*\*\*P<0.001.

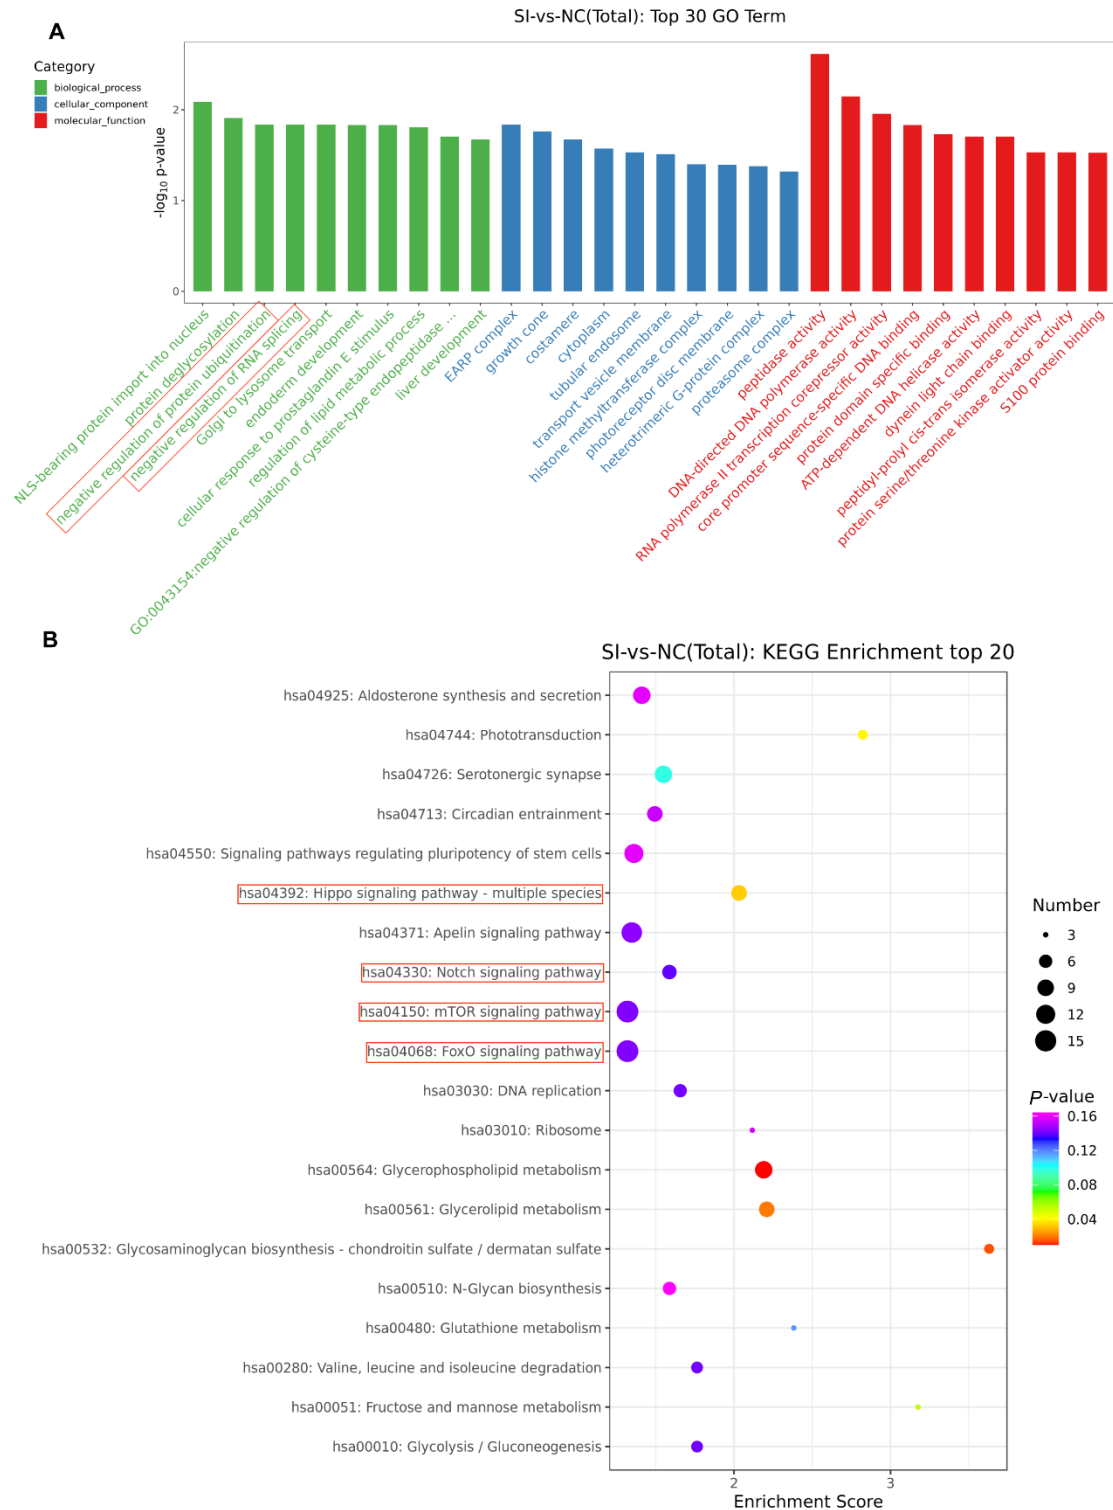

**Figure S3. Functional enrichment and pathway enrichment analysis of circRNAs by bioinformatics analysis. (A) Gene ontology (GO) classification. (B) Kyoto Encyclopedia of Genes and Genomes (KEGG) pathway classification.**

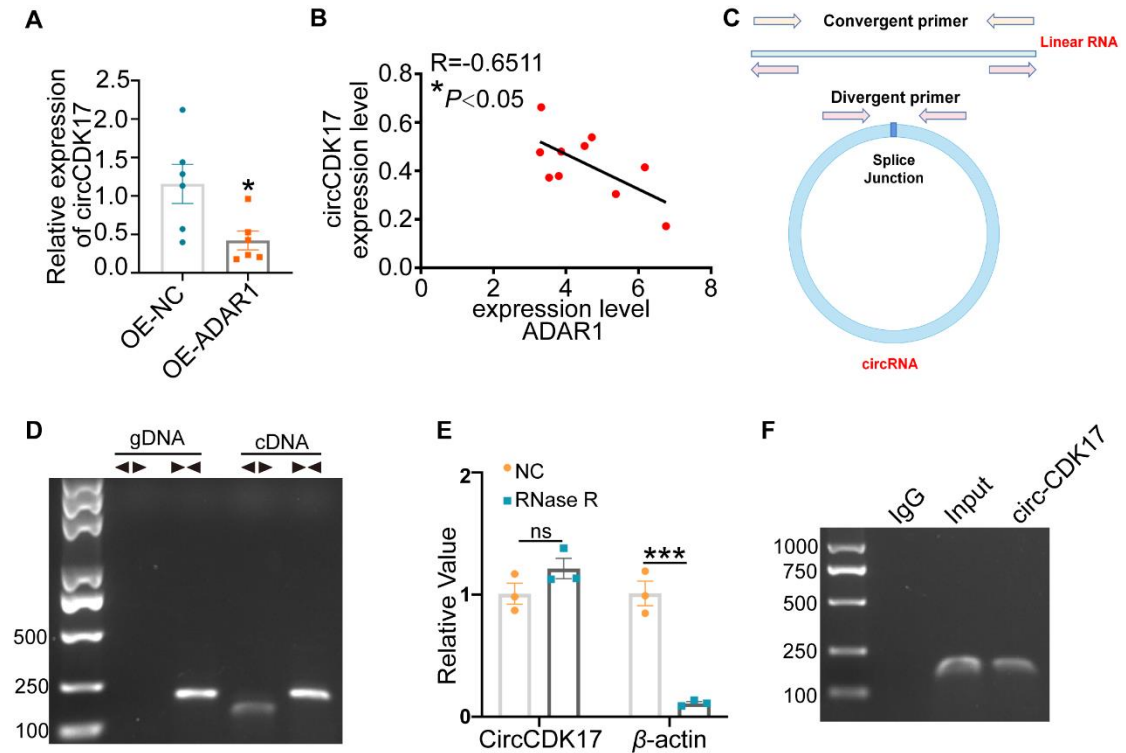

**Figure S4. Verification of the structure of circCDK17 and its association with ADAR1.** (A) qPCR analysis showing the expression of circCDK17 upon overexpression of ADAR1 (OE-ADAR1). n=6. (B) Correlation analysis between ADAR1 and circCDK17 *in vivo*. n=10. (C) Schematic illustration showing convergent and divergent primer design. (D) Agarose gel electrophoresis showing qPCR products of the opposite and back primers of circCDK17 cycling site. (E) RNase R experiment was performed to verify the ring structure of circCDK17. n=3. (F) RIP-qPCR experiment was performed to verify that ADAR1 binds to circCDK17. n=3. NC, negative control; OE, ADAR1 overexpression plasmid; ns, no significance; Statistical analysis was performed with the Student's t-test; All values are presented as mean  $\pm$  SEM. \*P<0.05, \*\*P<0.01, \*\*\*P<0.001.

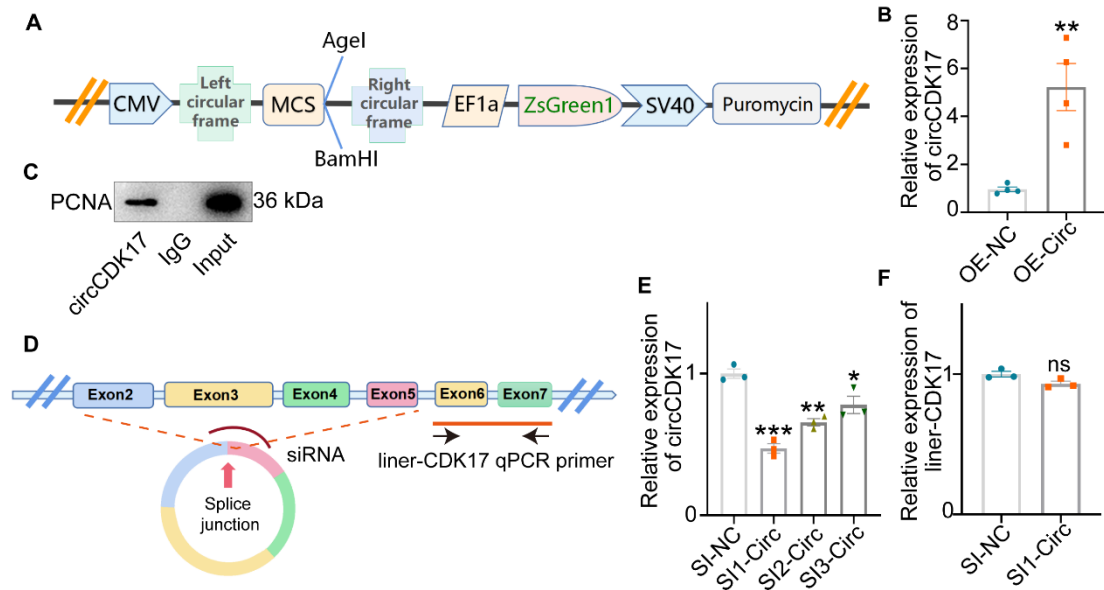

**Figure S5. Molecular modulation of circCDK17 expression with overexpression (OE) plasmid or siRNA. (A-B)** Schematic illustration showing the construction of circCDK17 plasmid (A) and qPCR analysis (B) showing the efficiency of circCDK17 overexpressed plasmid. n=4. **(C)** RNA immunoprecipitation showing that circCDK17 was directly bound to PCNA. n=3. **(D-E)** Schematic illustration showing the construction of circCDK17 siRNA and primer of liner CDK17 (D) and qPCR analysis showing the efficiency of circCDK17 siRNA (E). n=3. **(F)** qPCR analysis showing the effect of circCDK17 siRNA on linear CDK17. n=3. NC, negative control; SI, siRNA of circCDK17; OE, circCDK17 overexpression plasmid; ns, no significance; Statistical analysis was performed with one-way ANOVA followed by Dunnett's test or the Student's t-test; All values are presented as mean  $\pm$  SEM. \*P<0.05, \*\*P<0.01, \*\*\*P<0.001.

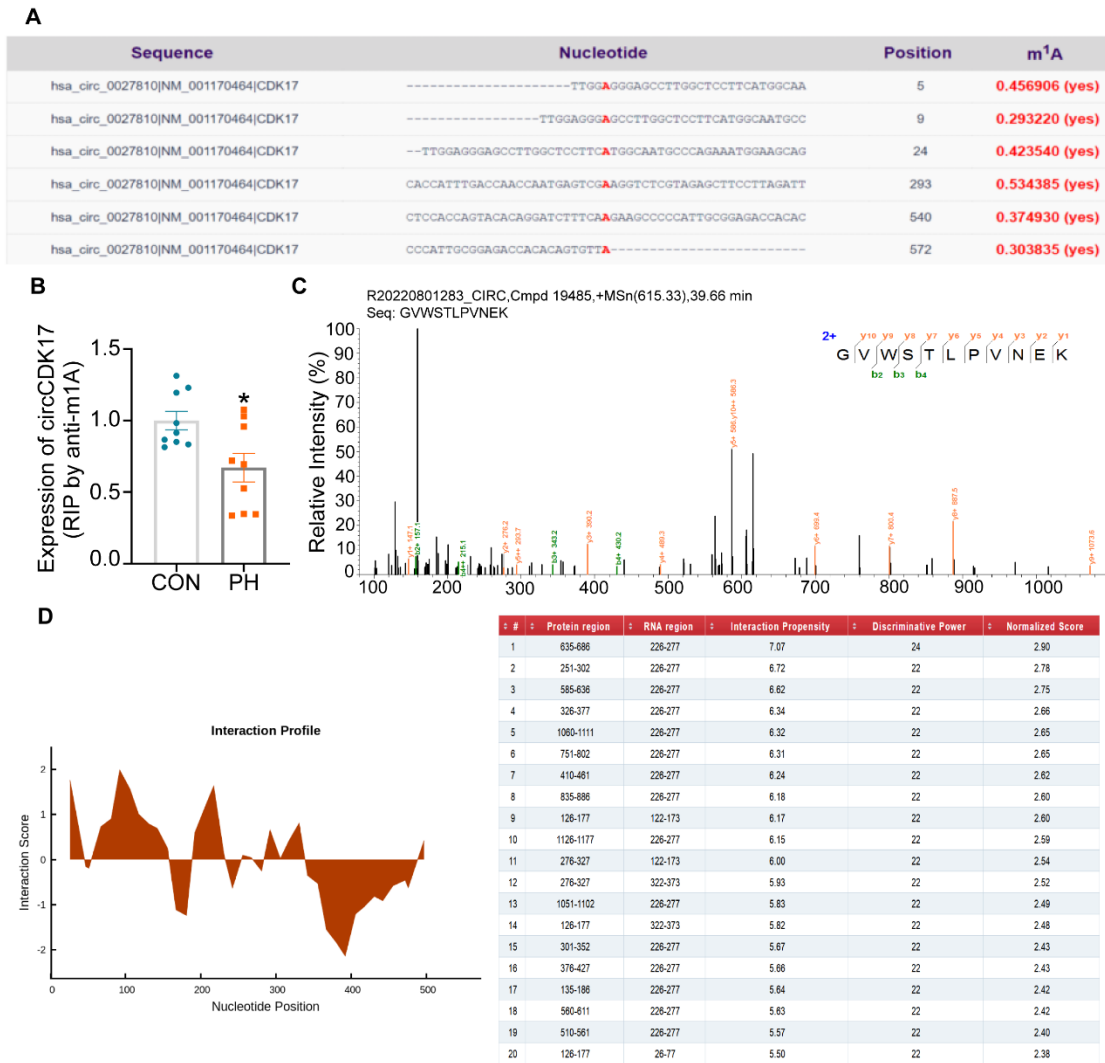

**Figure S6. Software analysis showing the m<sup>1</sup>A methylation modification sites in circCDK17 and its interaction with ADAR1. (A)** Deepromise (<https://deepromise.erc.monash.edu/>) online software analysis of m<sup>1</sup>A methylation modification sites. **(B)** RNA immunoprecipitation showing the m<sup>1</sup>A modification level of circCDK17 in lung tissue of PH patients. n=9. **(C)** RNA pull-down combined mass spectrometry showing the presence of YTHDC1 specific peptide. **(D)** CatRAPID software analysis showing the interaction sites between ADAR1 and circCDK17 ([http://service.tartaglialab.com/page/catrapid\\_group](http://service.tartaglialab.com/page/catrapid_group)).

## **Abbreviations**

PH Pulmonary hypertension

ADAR1 RNA adenosine deaminase 1

PCNA Proliferating cell nuclear antigen

PASMCs Pulmonary artery smooth muscle cells

PAECs Pulmonary artery endothelial cells

CircRNA Circular RNA

AAV9 serotype 9 adenovirus-associated virus

HE Hematoxylin and eosin

SiRNA Small interfering RNA

OE Overexpression

RIP RNA Binding Protein Immunoprecipitation

FISH Fluorescent in situ hybridization

DAPI 4',6-Diamidino-2-phenylindole

PBS Phosphate-buffered saline

HBSS Hank's Balanced Salt Solution

SMA Smooth muscle actin



**Table S1 Related primer sequences.**

| qPCR primer    | Forward                   | Reverse                |
|----------------|---------------------------|------------------------|
| ADAR1          | CATCCATTTCAAGGCTATGAGC    | GTACTGGAGGCAAGTAGTACTG |
| $\beta$ -actin | CTCGCCTTTGCCGATCC         | TCTCCATGTCGTCCCAGTTG   |
| circCDK17      | AGCTTCCTTAGATTTTTCAAGCCAC | AGGCCTGCCATTCTTCACAA   |
| circCDC14B     | CGGGCCTTGAAAAGCAGAAG      | CCATTGCCAGATTGAGTGGT   |
| circTBCD       | CAGTGACAAGGCCCGAGATG      | AACAGGCTCTACATCGGCAA   |
| circAPBB2      | ATGCAGCCACTGTTAACCCG      | GGCGGCAAATCTGGATCAGT   |
| CDK17          | ATTTTGGACTAGCCCGAGCC      | TCCGAGGAACCAAGAAGCAC   |

| Name                   | Sequences                                                                            |
|------------------------|--------------------------------------------------------------------------------------|
| circCDK17 biotin probe | 5' -3' TGTGGC+TTGAAAAA+TCTAAGGAAGC+TVTACG                                            |
| circCDK17 fish probe   | 5' -3' TGAATGTGGCT+TGAAAATC+TAAGGAAGC+TCTACGAGA                                      |
| SiRNA NC               | sense (5' -3') UUCUCCGAACGUGUCACGUTT<br>antisense (5' -3') ACGUGACACGUUCGGAGAATT     |
| ADAR1 siRNA 1          | sense (5' -3') CGGAUACUACACCCAUCCAUUTT<br>antisense (5' -3') AAUGGAUGGGUGUAGUAUCCGTT |
| ADAR1 siRNA 2          | sense (5' -3') GCAGGGUAUGUUGACUUUGAATT<br>antisense (5' -3') UUCAAGUCAACAUACCCUGCTT  |
| ADAR1 siRNA 3          | sense (5' -3') GCAUGGGUUUCACAGAGGUAATT<br>antisense (5' -3') UUACCUCUGUGAAACCAUGCTT  |
| YTHDC1 siRNA           | sense (5' -3') UGGAUUUGCAGGCGUGAAUUATT<br>antisense (5' -3') UAAUUCACGCCUGCAAUCCATT  |
| circCDK17 siRNA 1      | sense (5' -3') GAGCUUCCUUAGAUUUUUAATT<br>antisense (5' -3') UUGAAAAAUCUAAGGAAGCUCTT  |
| circCDK17 siRNA 2      | sense (5' -3') UUCUUAGAUUUUUAAGCCATT<br>antisense (5' -3') UGGCUUGAAAAAUCUAAGGAATT   |
| circCDK17 siRNA 3      | sense (5' -3') CCUUAGAUUUUUAAGCCACATT<br>antisense (5' -3') UGUGGCUUGAAAAAUCUAAGGTT  |

**Table S2 Clinical data of PH patients and controls.**

| Patient ID | Assay                           | Age, y | Sex | Race/Ethnicity | Diagnosis/Cause of Death          | mPAP (mmHg) |
|------------|---------------------------------|--------|-----|----------------|-----------------------------------|-------------|
| HPH-01     | qPCR (Lung Plasma)              | 68     | M   | Asian          | IPF associated PH                 | 63          |
| HPH-02     | qPCR (Lung Plasma)              | 57     | F   | Asian          | Pulmonary fibrosis associated PH  | 77          |
| HPH-03     | qPCR (Lung Plasma)              | 65     | F   | Asian          | Pulmonary fibrosis associated PH  | 42          |
| HPH-04     | qPCR (Lung Plasma)              | 56     | F   | Asian          | Pulmonary fibrosis associated PH  | 40          |
| HPH-05     | qPCR (Lung Plasma)              | 75     | M   | Asian          | Pulmonary fibrosis associated PH  | 38          |
| HPH-06     | qPCR (Lung Plasma)              | 55     | M   | Asian          | Pulmonary fibrosis associated PH  | 112         |
| HPH-07     | qPCR (Lung Plasma)              | 54     | M   | Asian          | Pulmonary fibrosis associated PH  | 55          |
| HPH-08     | qPCR (Lung Plasma)              | 58     | M   | Asian          | Pulmonary fibrosis associated PH  | 54          |
| HPH-09     | qPCR (Lung Plasma)              | 48     | M   | Asian          | Pulmonary fibrosis associated PH  | 50          |
| HPH-10     | qPCR (Lung Plasma)              | 58     | M   | Asian          | Pulmonary fibrosis associated PH  | 44          |
| HPH-11     | IF, IHC, WB, qPCR (Lung tissue) | 53     | M   | Asian          | Bronchiectasis PH                 | 71          |
| HPH-12     | IF, IHC, WB, qPCR (Lung tissue) | 43     | M   | Asian          | Silicosis PH                      | 97          |
| HPH-13     | IF, IHC, WB, qPCR (Lung tissue) | 60     | F   | Asian          | Pulmonary fibrosis associated PH  | 43          |
| HPH-14     | IF, IHC, WB, qPCR (Lung tissue) | 13     | F   | Asian          | Castleman's disease associated PH | 59          |
| HPH-15     | IF, IHC, WB, qPCR (Lung tissue) | 32     | F   | Asian          | PVOD associated PH                | 112         |
| HPH-16     | IF, IHC, WB, qPCR (Lung tissue) | 74     | M   | Asian          | Pulmonary fibrosis associated PH  | 69          |
| Control-01 | qPCR (Lung Plasma)              | 54     | F   | Asian          | Minimally invasive adenocarcinoma | N/A         |
| Control-02 | qPCR (Lung Plasma)              | 74     | F   | Asian          | Minimally invasive adenocarcinoma | N/A         |
| Control-03 | qPCR (Lung Plasma)              | 55     | M   | Asian          | Minimally invasive adenocarcinoma | N/A         |
| Control-04 | qPCR (Lung Plasma)              | 75     | M   | Asian          | Minimally invasive adenocarcinoma | N/A         |
| Control-05 | qPCR (Lung Plasma)              | 64     | F   | Asian          | N/A                               | N/A         |

|            |                                 |    |    |       |                                            |     |
|------------|---------------------------------|----|----|-------|--------------------------------------------|-----|
| Control-06 | qPCR (Lung Plasma)              | 66 | F  | Asian | Benign biopsy                              | N/A |
| Control-07 | qPCR (Lung Plasma)              | 70 | F  | Asian | N/A                                        | N/A |
| Control-08 | qPCR (Lung Plasma)              | 35 | F  | Asian | N/A                                        | N/A |
| Control-09 | qPCR (Lung Plasma)              | 41 | F  | Asian | Anoxia of brain                            | N/A |
| Control-10 | qPCR (Lung Plasma)              | 18 | F  | Asian | Pneumatocele                               | N/A |
| Control-11 | qPCR (Lung Plasma)              | 52 | M  | Asian | Pulmonary inflammatory pseudotumor         | N/A |
| Control-12 | qPCR (Lung Plasma)              | 44 | F  | Asian | Cystic teratoma                            | N/A |
| Control-13 | qPCR (Lung Plasma)              | 66 | F  | Asian | Sclerosing hemangioma                      | N/A |
| Control-14 | qPCR (Lung Plasma)              | 34 | F  | Asian | Pulmonary Atypical Adenomatous Hyperplasia | N/A |
| Control-15 | qPCR (Lung Plasma)              | 50 | F  | Asian | N/A                                        | N/A |
| Control-16 | IF, IHC, WB, qPCR (Lung tissue) | M  | 64 | Asian | Anoxia of brain                            | N/A |
| Control-17 | IF, IHC, WB, qPCR (Lung tissue) | F  | 56 | Asian | Adjacent normal tissues                    | N/A |
| Control-18 | IF, IHC, WB, qPCR (Lung tissue) | F  | 47 | Asian | Adjacent normal tissues                    | N/A |
| Control-19 | IF, IHC, WB, qPCR (Lung tissue) | M  | 42 | Asian | Anoxia of brain                            | N/A |
| Control-20 | IF, IHC, WB, qPCR (Lung tissue) | F  | 71 | Asian | Anoxia of brain                            | N/A |
| Control-21 | IF, IHC, WB, qPCR (Lung tissue) | F  | 56 | Asian | Adjacent normal tissues                    | N/A |

Definition of abbreviations: HPH, hypoxic pulmonary hypertension; F, female; M, male; PH, pulmonary hypertension; IPF, idiopathic pulmonary fibrosis; PVOD, pulmonary venoocclusive disease; mPAP, mean pulmonary artery pressure (mmHg); N/A, data not available.
